# Supplementary material for: iTAP, a novel iRhom interactor, controls TNF secretion by policing the stability of iRhom/TACE
Source: eLife. 2018 Jun 13;7:e35032. doi: 10.7554/eLife.35032 (PMC6042963; doi:10.7554/eLife.35032)
Supplement: Figure 3—figure supplement 1—source data 1. [file elife-35032-fig3-figsupp1-data1.xlsx]

## Sheet: Sheet1
	Title: iTAP ablation impairs the performance of TACE in activity assays. Figure 3-figure supplement 3
	% TACE activity (to WT IP)	replicate 1	replicate 2	replicate 3	avg	sem	t-test p-values
	WT Mock IP	18.5282	40.5502	24.6755	27.918	6.56067	0.218767
	iTAP KO Mock IP	31.3611	44.643	41.3217	39.1086	3.99062
	WT TACE 9301 IP	100	100	100	100	0	0.00871223
	iTAP KO 9301 IP	20.4786	62.8751	40.7186	41.3574	12.243
	WT Mock IP + BB94	23.8671	34.2189	33.2618	30.4492	3.30266	0.858763
	iTAP KO Mock IP + BB94	24.0023	35.5539	34.6162	31.3908	3.70415
	WT TACE 9301 IP + BB94	36.9049	35.9045	18.5526	30.454	5.9577	0.547857
	iTAP KO 9301 IP + BB94	32.5903	34.2795	36.4101	34.4267	1.10512
