# Supplementary material for: iTAP, a novel iRhom interactor, controls TNF secretion by policing the stability of iRhom/TACE
Source: eLife. 2018 Jun 13;7:e35032. doi: 10.7554/eLife.35032 (PMC6042963; doi:10.7554/eLife.35032)
Supplement: Figure 3—source data 1. — Alkaline phosphatase assays with TACE substrates. [file elife-35032-fig3-data1.xlsx]

## Sheet: Pre-analysis
	Title: PMA-stimulated TACE shedding is impaired in iTAP KO cells. AP-fused TACE substrates. Figure 3B
AREG-AP
	Replicate 1				Replicate 2				Replicate 3
	Measurement	WT	KO		Measurement	WT	KO		Measurement	WT	KO
	DMSO	0.116	0.066		DMSO	0.304	0.254		DMSO	0.206	0.256
	PMA	1.082	0.314		PMA	1.94	1.16		PMA	1.382	1.016
	Lysate	0.908	5.1009		Lysate	2.359	12.9801		Lysate	1.769	13.2888
	Blanked	WT	KO		Blanked	WT	KO		Blanked	WT	KO
	PMA	0.966	0.248		PMA	1.636	0.906		PMA	1.176	0.76
	Lysate	0.908	5.1009		Lysate	2.359	12.9801		Lysate	1.769	13.2888
	shed/total	WT	KO		shed/total	WT	KO		shed/total	WT	KO
		0.515475	0.0463647			0.409512	0.0652451			0.399321	0.0540971
	fold change	WT	KO		fold change	WT	KO		fold change	WT	KO
		1	0.0899455			1	0.159324			1	0.135473
EPIREG-AP
	Replicate 1				Replicate 2				Replicate 3				Replicate 4
	Measurement	WT	KO		Measurement	WT	KO		Measurement	WT	KO		Measurement	WT	KO
	DMSO	0.046	0.068		DMSO	0.322	0.154		DMSO	0.152	0.05		DMSO	0.046	0.054
	PMA	3.716	0.612		PMA	6.314	1.144		PMA	2.348	0.26		PMA	0.998	0.248
	Lysate	4.444	10.101		Lysate	21.49	20.418		Lysate	1.02	0.88		Lysate	1.496	2.163
	Blanked	WT	KO		Blanked	WT	KO		Blanked	WT	KO		Blanked	WT	KO
	PMA	3.67	0.544		PMA	5.992	0.99		PMA	2.196	0.21		PMA	0.952	0.194
	Lysate	4.444	10.101		Lysate	21.49	20.418		Lysate	1.02	0.88		Lysate	1.496	2.163
	shed/total	WT	KO		shed/total	WT	KO		shed/total	WT	KO		shed/total	WT	KO
		0.452305	0.0511038			0.218034	0.0462444			0.682836	0.192661			0.388889	0.082308
	fold change	WT	KO		fold change	WT	KO		fold change	WT	KO		fold change	WT	KO
		1	0.112985			1	0.212098			1	0.282148			1	0.211649
HB-EGF-AP
	Replicate 1				Replicate 2				Replicate 3
	Measurement	WT	KO		Measurement	WT	KO		Measurement	WT	KO
	DMSO	-0.142	-0.112		DMSO	0.286	0.126		DMSO	0.944	0.432
	PMA	6.486	1.082		PMA	6.128	0.884		PMA	9.934	1.722
	Lysate	14.131	58.7874		Lysate	8.988	32.6256		Lysate	23.326	61.1961
	Blanked	WT	KO		Blanked	WT	KO		Blanked	WT	KO
	PMA	6.628	1.194		PMA	5.842	0.758		PMA	8.99	1.29
	Lysate	14.131	58.7874		Lysate	8.988	32.6256		Lysate	23.326	61.1961
	shed/total	WT	KO		shed/total	WT	KO		shed/total	WT	KO
		0.319283	0.0199062			0.393931	0.0227058			0.27819	0.0206446
	fold change	WT	KO		fold change	WT	KO		fold change	WT	KO
		1	0.0623464			1	0.0576389			1	0.0742103
TGFα-AP
	Replicate 1				Replicate 2				Replicate 3
	Measurement	WT	KO		Measurement	WT	KO		Measurement	WT	KO
	DMSO	1.488	0.94		DMSO	2.474	1.22		DMSO	1.806	1.856
	PMA	11.208	3.554		PMA	13.678	4.924		PMA	2.982	2.616
	Lysate	7.59	39.4044		Lysate	16.44	44.2155		Lysate	2.569	14.9688
	Blanked	WT	KO		Blanked	WT	KO		Blanked	WT	KO
	PMA	9.72	2.614		PMA	11.204	3.704		PMA	1.176	0.76
	Lysate	7.59	39.4044		Lysate	16.44	44.2155		Lysate	2.569	14.9688
	shed/total	WT	KO		shed/total	WT	KO		shed/total	WT	KO
		0.561525	0.0622108			0.405296	0.0772963			0.314019	0.048319
	fold change	WT	KO		fold change	WT	KO		fold change	WT	KO
		1	0.110789			1	0.190716			1	0.153873
TNF-AP
	Replicate 1				Replicate 2				Replicate 3
	Measurement	WT	KO		Measurement	WT	KO		Measurement	WT	KO
	DMSO	0.63	1.178		DMSO	1.71	0.564		DMSO	5.47	4.61
	PMA	4.756	3.356		PMA	2.988	1.148		PMA	12.388	8.956
	Lysate	2.238	21.766		Lysate	1.668	6.308		Lysate	6.866	26.584
	Blanked	WT	KO		Blanked	WT	KO		Blanked	WT	KO
	PMA	4.126	2.178		PMA	1.278	0.584		PMA	6.918	4.346
	Lysate	2.238	21.766		Lysate	1.668	6.308		Lysate	6.866	26.584
	shed/total	WT	KO		shed/total	WT	KO		shed/total	WT	KO
		0.648334	0.0909622			0.433809	0.0847359			0.501886	0.140511
	fold change	WT	KO		fold change	WT	KO		fold change	WT	KO
		1	0.140301			1	0.19533			1	0.279965

## Sheet: Post analysis
	Title: PMA-stimulated TACE shedding is impaired in iTAP KO cells. AP-fused TACE substrates. Figure 3B
AREG-AP
Fold change		Replicate 1	Replicate 2	Replicate 3		AVERAGE	STDEV	t-test p-value
	WT	1	1	1		1	0	0.000544545
	KO	0.0899455	0.159324	0.135473		0.128247	0.0352491
EPIREG-AP
Fold change		Replicate 1	Replicate 2	Replicate 3	Replicate 4	AVERAGE	STDEV	t-test p-value
	WT	1	1	1	1	1	0	0.000183139
	KO	0.112985	0.212098	0.282148	0.211649	0.20472	0.0695527
HB-EGF-AP
Fold change		Replicate 1	Replicate 2	Replicate 3		AVERAGE	STDEV	t-test p-value
	WT	1	1	1		1	0	2.77868e-05
	KO	0.0623464	0.0576389	0.0742103		0.0647319	0.00853936
TGFα-AP
Fold change		Replicate 1	Replicate 2	Replicate 3		AVERAGE	STDEV	t-test p-value
	WT	1	1	1		1	0	0.000740623
	KO	0.110789	0.190716	0.153873		0.151793	0.0400039
TNF-AP
Fold change		Replicate 1	Replicate 2	Replicate 3		AVERAGE	STDEV	t-test p-value
	WT	1	1	1		1	0	0.00260154
	KO	0.140301	0.19533	0.279965		0.205199	0.0703531
