# Supplementary material for: iTAP, a novel iRhom interactor, controls TNF secretion by policing the stability of iRhom/TACE
Source: eLife. 2018 Jun 13;7:e35032. doi: 10.7554/eLife.35032 (PMC6042963; doi:10.7554/eLife.35032)
Supplement: Figure 3—source data 2. — Alkaline phosphatase assays with TACE substrates ± iTAP. [file elife-35032-fig3-data2.xlsx]

## Sheet: Pre-analysis
	Title: Expression of iTAP rescues the impaired shedding in iTAP KO cells. AP-fused TACE substrates. Figure 3C,D
AREG-AP
	Replicate 1								Replicate 2								Replicate 3
		vector	iTAP	vector	iTAP	vector	iTAP			vector	iTAP	vector	iTAP	vector	iTAP			vector	iTAP	vector	iTAP	vector	iTAP
	Measurement	WT	WT	KO 'A'	KO 'A'	KO 'B'	KO 'B'		Measurement	WT	WT	KO 'A'	KO 'A'	KO 'B'	KO 'B'		Measurement	WT	WT	KO 'A'	KO 'A'	KO 'B'	KO 'B'
	DMSO	0.1162	0.1419	0.0283	0.0225	0.0134	0.0418		DMSO	-0.0179	-0.0047	-0.0151	-0.0089	-0.0147	-0.0107		DMSO	-0.0049	-0.0056	-0.0104	-0.0024	-0.0122	-0.0008
	PMA	1.2873	1.3255	0.241	0.4128	0.1656	0.7289		PMA	0.0534	0.256	0.0026	0.0849	0.0033	0.1246		PMA	0.1446	0.1715	0.0171	0.1675	0.0211	0.1421
	Lysate	1.1338	0.9301	2.3708	0.396	1.8339	0.7087		Lysate	0.116	0.339	0.3591	0.1231	0.4191	0.1725		Lysate	0.0436	0.0505	0.1219	0.0425	0.1161	0.03
	Blanked	WT	WT	KO 'A'	KO 'A'	KO 'B'	KO 'B'		Blanked	WT	WT	KO 'A'	KO 'A'	KO 'B'	KO 'B'		Blanked	WT	WT	KO 'A'	KO 'A'	KO 'B'	KO 'B'
	PMA	1.1711	1.1836	0.2127	0.3903	0.1522	0.6871		PMA	0.0713	0.2607	0.0177	0.0938	0.018	0.1353		PMA	0.1495	0.1771	0.0275	0.1699	0.0333	0.1429
	Lysate	1.1338	0.9301	2.3708	0.396	1.8339	0.7087		Lysate	0.116	0.339	0.3591	0.1231	0.4191	0.1725		Lysate	0.0436	0.0505	0.1219	0.0425	0.1161	0.03
	shed/total	WT	WT	KO 'A'	KO 'A'	KO 'B'	KO 'B'		shed/total	WT	WT	KO 'A'	KO 'A'	KO 'B'	KO 'B'		shed/total	WT	WT	KO 'A'	KO 'A'	KO 'B'	KO 'B'
		0.508091	0.559966	0.0823302	0.496375	0.0766326	0.492263			0.380673	0.434717	0.0469745	0.432457	0.0411805	0.439571			0.77421	0.77812	0.18407	0.799906	0.222892	0.826489
	fold change	WT	WT	KO 'A'	KO 'A'	KO 'B'	KO 'B'		fold change	WT	WT	KO 'A'	KO 'A'	KO 'B'	KO 'B'		fold change	WT	WT	KO 'A'	KO 'A'	KO 'B'	KO 'B'
		1	1.1021	0.162038	0.976941	0.150824	0.968846			1	1.14197	0.123399	1.13603	0.108178	1.15472			1	1.00505	0.237751	1.03319	0.287895	1.06753
TGFα-AP
	Replicate 1								Replicate 2								Replicate 3
		vector	iTAP	vector	iTAP	vector	iTAP			vector	iTAP	vector	iTAP	vector	iTAP			vector	iTAP	vector	iTAP	vector	iTAP
	Measurement	WT	WT	KO 'A'	KO 'A'	KO 'B'	KO 'B'		Measurement	WT	WT	KO 'A'	KO 'A'	KO 'B'	KO 'B'		Measurement	WT	WT	KO 'A'	KO 'A'	KO 'B'	KO 'B'
	DMSO	0.1081	0.2339	0.0526	0.0293	0.0183	0.0204		DMSO	-0.0085	0.0315	-0.0014	-0.004	-0.0123	0.0003		DMSO	0.005	0.0137	0.0007	0.011	0.0021	0.0052
	PMA	1.064	1.6252	0.2706	0.4122	0.221	0.6858		PMA	0.1851	0.7943	0.074	0.2143	0.0557	0.4476		PMA	0.2939	0.4182	0.0718	0.2368	0.0751	0.3784
	Lysate	1.2652	1.29	1.9789	0.3987	1.7443	0.5675		Lysate	0.1769	0.5238	0.7054	0.1958	0.438	0.2774		Lysate	0.0591	0.0727	0.174	0.0698	0.1346	0.0394
	Blanked	WT	WT	KO 'A'	KO 'A'	KO 'B'	KO 'B'		Blanked	WT	WT	KO 'A'	KO 'A'	KO 'B'	KO 'B'		Blanked	WT	WT	KO 'A'	KO 'A'	KO 'B'	KO 'B'
	PMA	0.9559	1.3913	0.218	0.3829	0.2027	0.6654		PMA	0.1936	0.7628	0.0754	0.2183	0.068	0.4473		PMA	0.2889	0.4045	0.0711	0.2258	0.073	0.3732
	Lysate	1.2652	1.29	1.9789	0.3987	1.7443	0.5675		Lysate	0.1769	0.5238	0.7054	0.1958	0.438	0.2774		Lysate	0.0591	0.0727	0.174	0.0698	0.1346	0.0394
	shed/total	WT	WT	KO 'A'	KO 'A'	KO 'B'	KO 'B'		shed/total	WT	WT	KO 'A'	KO 'A'	KO 'B'	KO 'B'		shed/total	WT	WT	KO 'A'	KO 'A'	KO 'B'	KO 'B'
		0.430372	0.51889	0.0992307	0.489893	0.104109	0.539703			0.522537	0.59288	0.0965676	0.527167	0.134387	0.617221			0.830172	0.847653	0.290086	0.76387	0.351638	0.904508
	fold change	WT	WT	KO 'A'	KO 'A'	KO 'B'	KO 'B'		fold change	WT	WT	KO 'A'	KO 'A'	KO 'B'	KO 'B'		fold change	WT	WT	KO 'A'	KO 'A'	KO 'B'	KO 'B'
		1	1.20568	0.230569	1.1383	0.241904	1.25404			1	1.13462	0.184805	1.00886	0.257182	1.1812			1	1.02106	0.349428	0.920134	0.423572	1.08954

## Sheet: Post-analysis
	Title: Expression of iTAP rescues the impaired shedding in iTAP KO cells. AP-fused TACE substrates. Figure 3C,D
	AREG-AP
	Fold change			Replicate 1	Replicate 2	Replicate 3	AVERAGE	STDEV	t-test p-value
		vector	WT	1	1	1	1	0	0.177859
		iTAP	WT	1.1021	1.14197	1.00505	1.08304	0.0704223
		vector	KO 'A'	0.162038	0.123399	0.237751	0.174396	0.0581694	0.000108498
		iTAP	KO 'A'	0.976941	1.13603	1.03319	1.04872	0.080676
		vector	KO 'B'	0.150824	0.108178	0.287895	0.182299	0.0939019	0.000320785
		iTAP	KO 'B'	0.968846	1.15472	1.06753	1.0637	0.092997
	TGFα-AP
	Fold change			Replicate 1	Replicate 2	Replicate 3	AVERAGE	STDEV	t-test p-value
		vector	WT	1	1	1	1	0	0.154383
		iTAP	WT	1.20568	1.13462	1.02106	1.12045	0.0931222
		vector	KO 'A'	0.230569	0.184805	0.349428	0.254934	0.084973	0.000663578
		iTAP	KO 'A'	1.1383	1.00886	0.920134	1.02243	0.109714
		vector	KO 'B'	0.241904	0.257182	0.423572	0.307553	0.100765	0.000322018
		iTAP	KO 'B'	1.25404	1.1812	1.08954	1.17493	0.0824269
