# Supplementary material for: iTAP, a novel iRhom interactor, controls TNF secretion by policing the stability of iRhom/TACE
Source: eLife. 2018 Jun 13;7:e35032. doi: 10.7554/eLife.35032 (PMC6042963; doi:10.7554/eLife.35032)
Supplement: Figure 3—source data 3. — Alkaline phosphatase assays with ADAM10 substrates. [file elife-35032-fig3-data3.xlsx]

## Sheet: Pre-analysis
	Title: The shedding impairement is specific to TACE. AP-fused ADAM10 substrates. Figure 3E
BTC-AP
	Replicate 1				Replicate 2				Replicate 3
	Measurement	WT	KO		Measurement	WT	KO		Measurement	WT	KO
	DMSO	3.256	5.226		DMSO	4.406	3.876		DMSO	4.262	4.632
	PMA	25.626	52.056		PMA	51.542	48.688		PMA	54.036	43.596
	Lysate	0.521	1.108		Lysate	2.244	1.648		Lysate	1.268	1.156
	Blanked	WT	KO		Blanked	WT	KO		Blanked	WT	KO
	PMA	22.37	46.83		PMA	47.136	44.812		PMA	49.774	38.964
	Lysate	0.521	1.108		Lysate	2.244	1.648		Lysate	1.268	1.156
	shed/total	WT	KO		shed/total	WT	KO		shed/total	WT	KO
		0.97724	0.976887			0.954557	0.964529			0.975158	0.971186
	fold change	WT	KO		fold change	WT	KO		fold change	WT	KO
		1	0.999639			1	1.01045			1	0.995928
EGF-AP
	Replicate 1				Replicate 2				Replicate 3				Replicate 4				Replicate 5
	Measurement	WT	KO		Measurement	WT	KO		Measurement	WT	KO		Measurement	WT	KO		Measurement	WT	KO
	DMSO	8.67	29.314		DMSO	9.926	2.882		DMSO	11.598	5.428		DMSO	1.23	0.894		DMSO	0.914	1.464
	PMA	18.806	40.328		PMA	28.756	27.812		PMA	54.872	25.28		PMA	1.712	1.056		PMA	3.19	3.866
	Lysate	10.705	9.6035		Lysate	3.834	3		Lysate	2.54	1.562		Lysate	28.363	18.681		Lysate	17.372	24.026
	Blanked	WT	KO		Blanked	WT	KO		Blanked	WT	KO		Blanked	WT	KO		Blanked	WT	KO
	PMA	10.136	11.014		PMA	18.83	24.93		PMA	43.274	19.852		PMA	0.482	0.162		PMA	2.276	2.402
	Lysate	10.705	9.6035		Lysate	3.834	3		Lysate	2.54	1.562		Lysate	28.363	18.681		Lysate	17.372	24.026
	shed/total	WT	KO		shed/total	WT	KO		shed/total	WT	KO		shed/total	WT	KO		shed/total	WT	KO
		0.486349	0.534206			0.830833	0.892589			0.944558	0.927057			0.01671	0.00859736			0.115839	0.0908885
	fold change	WT	KO		fold change	WT	KO		fold change	WT	KO		fold change	WT	KO		fold change	WT	KO
		1	1.0984			1	1.07433			1	0.981471			1	0.514504			1	0.784612

## Sheet: Post-analysis
	Title: The shedding impairement is specific to TACE. AP-fused ADAM10 substrates. Figure 3E
AREG-AP
Fold change		Replicate 1	Replicate 2	Replicate 3			AVERAGE	STDEV	t-test p-value
	WT	1	1	1			1	0	0.42265
	KO	0.999639	1	1			0.99988	0.000208641
EPIREG-AP
Fold change		Replicate 1	Replicate 2	Replicate 3	Replicate 4	Replicate 5	AVERAGE	STDEV	t-test p-value
	WT	1	1	1	1	1	1	0	0.37281
	KO	1.0984	1.07433	0.981471	0.514504	0.784612	0.890664	0.243863
