# Supplementary material for: iTAP, a novel iRhom interactor, controls TNF secretion by policing the stability of iRhom/TACE
Source: eLife. 2018 Jun 13;7:e35032. doi: 10.7554/eLife.35032 (PMC6042963; doi:10.7554/eLife.35032)
Supplement: Figure 3—source data 4. — Secreted luciferase. [file elife-35032-fig3-data4.xlsx]

## Sheet: Sheet1
	Title: Global secretion is not impaired in iTAP KO cells. Secreted luciferase. Figure 3F
Stimulated cells	Measurement			Fold change
PMA	Replicate 1	Replicate 2	Replicate 3	Replicate 1	Replicate 2	Replicate 3	AVERAGE	STDEV	t-test p-values
WT	0.306748	0.376059	0.136083	1	1	1	1	0
KO 'A'	0.511131	0.478424	0.249405	1.66629	1.2722	1.83274	1.59041	0.287869	0.0709168
KO 'B'	0.405445	0.568096	0.336105	1.32175	1.51066	2.46986	1.76742	0.615618	0.163467
	Measurement			Fold change
DMSO	Replicate 1	Replicate 2	Replicate 3	Replicate 1	Replicate 2	Replicate 3	AVERAGE	STDEV	t-test p-values
WT	0.5	0.915047	0.897944	1	1	1	1	0
KO 'A'	0.55	0.938876	0.907701	1.1	1.02604	1.01087	1.04564	0.0476884	0.239273
KO 'B'	0.67	0.923519	0.889254	1.34	1.00926	0.990322	1.11319	0.196648	0.423809
