# Supplementary material for: iTAP, a novel iRhom interactor, controls TNF secretion by policing the stability of iRhom/TACE
Source: eLife. 2018 Jun 13;7:e35032. doi: 10.7554/eLife.35032 (PMC6042963; doi:10.7554/eLife.35032)
Supplement: Figure 4—source data 1. — Densitometric analyses of mature/immature TACE levels. [file elife-35032-fig4-data1.xlsx]

## Sheet: Sheet1
	Title: iTAP KO cells are depleted in mature TACE levels. Densitometric analyses of mature/immature TACE levels. Figure 4B
	Densitometric values						Left-hand panel: Immature TACE/TfR
	Replicate 1	Replicate 2	Replicate 3	Replicate 4			Replicate 1	Replicate 2	Replicate 3	Replicate 4	AVERAGE	STDEV	t-test
	immature TACE					WT	0.529834	0.608117	0.955171	1.19741	0.822632	0.31079	0.77539
WT	39203.910	23869.158	31280.735	35346.220		KO	0.691699	0.762788	0.471203	1.7517	0.919348	0.568619
KO	59483.780	27860.108	16880.643	36652.141
	mature TACE						Right-hand panel: Mature TACE/Immature TACE
WT	51602.609	30634.108	30768.806	35540.099			Replicate 1	Replicate 2	Replicate 3	Replicate 4	AVERAGE	STDEV	t-test
KO	6215.660	2999.719	1795.456	1479.142		WT	1.31626	1.28342	0.983634	1.00549	1.1472	0.176988	2.29598e-05
	TfR					KO	0.104493	0.107671	0.106362	0.0403562	0.0897205	0.0329354
WT	73992.881	39250.948	32748.836	29518.927
KO	85996.680	36524.049	35824.593	20923.735
