# Supplementary material for: iTAP, a novel iRhom interactor, controls TNF secretion by policing the stability of iRhom/TACE
Source: eLife. 2018 Jun 13;7:e35032. doi: 10.7554/eLife.35032 (PMC6042963; doi:10.7554/eLife.35032)
Supplement: Figure 4—source data 2. — Densitometric analyses of mature/immature TACE levels. [file elife-35032-fig4-data2.xlsx]

## Sheet: Sheet1
	Title: iTAP expression restores the presence of mature TACE in iTAP KO cells. Densitometric analyses of mature/immature TACE levels. Figure 4E
	Densitometric values					Top panel: Mature TACE/Immature TACE
	Replicate 1	Replicate 2	Replicate 3			Replicate 1	Replicate 2	Replicate 3	AVERAGE	STDEV	t-test
	immature TACE				WT + EV	0.353806	0.51035	0.262404	0.37552	0.125391	0.0520313
WT + EV	23581.2	24433.5	18844.5		WT +iTAP	0.60617	0.942947	1.27831	0.942475	0.33607
WT +iTAP	22261.5	20813.7	11747.1		KO 'A' + EV	0.0737982	0.0330695	0.0431412	0.050003	0.0212137	0.00189308
KO 'A' + EV	19175.2	19037.4	6896.1		KO 'A' + iTAP	1.41357	1.17568	1.84472	1.47799	0.339143
KO 'A' + iTAP	12660.8	23005.9	10132.4		KO 'B' + EV	0.0334974	0.043012	0.105427	0.0606454	0.0390726	0.00117289
KO 'B' + EV	19380.4	25513.5	17737.8		KO 'B' + iTAP	1.3069	1.03341	1.54485	1.29505	0.255929
KO 'B' + iTAP	18229.3	27897.1	15254
	mature TACE					Bottom panel: Immature TACE/actin
WT + EV	8343.15	12469.6	4944.85			Replicate 1	Replicate 2	Replicate 3	AVERAGE	STDEV	t-test
WT +iTAP	13494.3	19626.2	15016.4		WT + EV	0.986685	1.32573	2.51097	1.60779	0.800332	0.436001
KO 'A' + EV	1415.09	629.557	297.506		WT +iTAP	0.813765	0.876503	1.71657	1.13561	0.504104
KO 'A' + iTAP	17896.9	27047.6	18691.5		KO 'A' + EV	0.620284	0.75521	1.34028	0.90526	0.382736	0.661816
KO 'B' + EV	649.192	1097.38	1870.04		KO 'A' + iTAP	0.474153	1.24816	0.520836	0.747715	0.434022
KO 'B' + iTAP	23823.9	28829.1	23565.2		KO 'B' + EV	0.822623	1.41536	0.900288	1.04609	0.322147	0.60365
	Actin				KO 'B' + iTAP	0.782646	1.91652	1.09111	1.26343	0.58625
WT + EV	23899.4	18430.2	7504.85
WT +iTAP	27356.2	23746.3	6843.32
KO 'A' + EV	30913.5	25208.1	5145.25
KO 'A' + iTAP	26701.9	18431.9	19454.1
KO 'B' + EV	23559.3	18026.1	19702.4
KO 'B' + iTAP	23291.9	14556.1	13980.2
