# Supplementary material for: iTAP, a novel iRhom interactor, controls TNF secretion by policing the stability of iRhom/TACE
Source: eLife. 2018 Jun 13;7:e35032. doi: 10.7554/eLife.35032 (PMC6042963; doi:10.7554/eLife.35032)
Supplement: Figure 5—source data 1. — Densitometric analysis on iRhom2-HA in a CHX course. [file elife-35032-fig5-data1.xlsx]

## Sheet: Sheet1
	Title: iTAP expression enhances the stability and half-life of iRhom2.Densitometric analysis on iRhom2-HA in a CHX course. Figure 5B
Densitometric values							Survival
	Replicate 1		Replicate 2		Replicate 3		Replicate 1		Replicate 2		Replicate 3		AVERAGE		STDEV
time(h):	EV	iTAP	EV	iTAP	EV	iTAP	EV	iTAP	EV	iTAP	EV	iTAP	EV	iTAP	EV	iTAP	ttests p-values
0	35177.6	55212.2	39154.6	79625.3	14377.5	74255.1	1	1	1	1	1	1	1	1	0	0
1	23354.4	61581.4	21684.4	70794.2	8830.36	67435.8	0.663899	1.11536	0.553815	0.889091	0.614177	0.908163	0.61063	0.970871	0.0551275	0.125493	0.0104004	time: 1h t-test;two tails;unpaired equal variance
2	16527.2	51861.6	17965.1	60572	5236.83	62711.6	0.469823	0.939313	0.458825	0.760713	0.364237	0.844543	0.430962	0.84819	0.0580463	0.089356	0.00246739	time: 2h t-test;two tails;unpaired equal variance
3	5661.59	29951.8	9081.17	37173.5	1223.41	58983.5	0.160943	0.542485	0.231931	0.466855	0.0850915	0.794336	0.159322	0.601225	0.0734332	0.171461	0.0148107	time: 3h t-test;two tails;unpaired equal variance
4	2070.82	13778.2	2750.99	35545.2	480.263	67365.8	0.0588676	0.249549	0.0702596	0.446406	0.0334037	0.907221	0.054177	0.534392	0.0188704	0.337549	0.0696715	time: 4h t-test;two tails;unpaired equal variance
