# Supplementary material for: iTAP, a novel iRhom interactor, controls TNF secretion by policing the stability of iRhom/TACE
Source: eLife. 2018 Jun 13;7:e35032. doi: 10.7554/eLife.35032 (PMC6042963; doi:10.7554/eLife.35032)
Supplement: Figure 5—source data 2. — Densitometric analysis of the cell surface fractions of iRhom2-HA or TfR. [file elife-35032-fig5-data2.xlsx]

## Sheet: Sheet1
	Title: iTAP expression stabilizes iRhom2 on the cell surface. Densitometry. Figure 5G
	iRhom2-HA
	Desitometric values			Survival
	Replicate 1	Replicate 2	Replicate 3	Replicate 1	Replicate 2	Replicate 3	AVERAGE	SEM	t-tests p-values
EV 0	42758.2	11292.9	110992	1	1	1	1	0
EV CHX	18923.1	4179.06	50870.8	0.44256	0.370061	0.458329	0.42365	0.0271786	0.00221633
iTAP 0	86390.7	51220.3	120448	1	1	1	1	0
iTAP CHX	76344.1	47645.2	59426.4	0.883707	0.930202	0.49338	0.769096	0.13851	0.237433
	Transferin Receptor
	Desitometric values			Survival
	Replicate 1	Replicate 2	Replicate 3	Replicate 1	Replicate 2	Replicate 3	AVERAGE	SEM	t-tests p-values
EV 0	42484.9	36806.2	40356.5	1	1	1	1	0
EV CHX	31687.5	12809.4	44611.4	0.745852	0.348022	1.10543	0.733103	0.218739	0.346748
iTAP 0	32179.8	23459.3	38729.3	1	1	1	1	0
iTAP CHX	30441.5	7613.15	33567.3	0.94598	0.324526	0.866716	0.712407	0.195286	0.278722
