# Supplementary material for: iTAP, a novel iRhom interactor, controls TNF secretion by policing the stability of iRhom/TACE
Source: eLife. 2018 Jun 13;7:e35032. doi: 10.7554/eLife.35032 (PMC6042963; doi:10.7554/eLife.35032)
Supplement: Figure 6—source data 1. [file elife-35032-fig6-data1.xlsx]

## Sheet: Sheet1
	Title: Colocalization analyses LAMP2-mCherry iRhom2 (WT vs KO HeLa and rescue). Figure 6A, B
Colocalization analysis between mCherry-IRhom2 and endogenous LAMP2 in HeLa wildtype and mixed population of HeLa iTAP KO cells
	Pearson's correlation for individual cells, thresholded at 10 for each channel usiong the Volocity Thresholding tool
experiment 1:	WT	KO
	0.138	0.311
	0.387	0.389
	0.004	0.252
	0.179	0.288
	0.193	0.213
	0.076	0.226
	0.01	0.314
	0.09	0.247
	0.141	0.298
	0.033	0.315
	0.114	0.144
	-0.047	0.187
	-0.071	0.404
	0.132	0.373
	0.202	0.352
	0.123	0.402
	0.172	0.31
	0.227	0.503
	0.148	0.142
	0.187	0.564
	0.049	0.307
	-0.001	0.313
	0.006	0.433
	0.172	0.325
experiment 2	-0.005	0.54
	-0.017	0.45
	0.001	0.427
	-0.11	0.39
	-0.088	0.29
	-0.048	0.48
	-0.036	0.56
	-0.077	0.519
	-0.023	0.53
	-0.056	0.606
	-0.005	0.501
	-0.004	0.394
	-0.031	0.435
	-0.0687	0.463
	-0.081	0.469
	-0.086	0.377
	-0.046	0.332
	-0.068	0.404
	0.066	0.268
	0.087	0.419
average	0.0447341	0.374227
STDEV	0.110002	0.114086
t-test		1.72047e-23
Rescue of lysosome localization through co-expression of iTAP-GFP with mCherry-iRhom2 in mixed population of iTAP KOs
	Pearson's correlation for individual cells , thresholded at 10 for each channel
experiment 1:	WT	KO
	0.166	0.093
	0.113	0.114
	0.186	0.134
	-0.026	0.032
	0.015	0.046
	0.003	0.031
	-0.023	0.037
	-0.009	0.094
	-0.004	0.024
	-0.021	0.005
	0.029	0.01
	0.008	0.046
	0.001	0.071
	0.009	0.049
	0.042	0.052
	0.093	0.006
	0.001	0.112
experiment 2:	0.096	-0.004
	0.068	0.058
	0.067	-0.012
	0.013	-0.004
	0.178	-0.003
	0.094	-0.01
	-0.024	0.001
	0.042	0.004
	0.012	0.024
	-0.004	0.046
	0.025	0.104
	0.002	-0.033
	0.044	-0.008
	-0.031	0.037
	0.034	0.06
	-0.004	0.021
	0.059	0.027
	0.009	0.028
	0.029	0.039
average	0.0358889	0.0369722
STDEV	0.0567072	0.0403594
t-test		0.925892
