# Supplementary material for: iTAP, a novel iRhom interactor, controls TNF secretion by policing the stability of iRhom/TACE
Source: eLife. 2018 Jun 13;7:e35032. doi: 10.7554/eLife.35032 (PMC6042963; doi:10.7554/eLife.35032)
Supplement: Figure 7—source data 1. — TNF ELISA. [file elife-35032-fig7-data1.xlsx]

## Sheet: TNF (2)
	Title: iTAP is essential for TNF secretion in primary macrophages. Figure 7E
	TNF Replicate #2 (shown)
	Protein Conc(pg/ml)	#1	#2	#3	Average	STDEV	STD ERROR
0 LPS	no oligo	129.757	22.6143	65.4714	72.6143	53.9274	31.135
	ns oligo	-7.38571	112.614	54.0429	53.0905	60.0057	34.6443
	iTAP oligo #1	11.1857	11.1857	14.0429	12.1381	1.64957	0.952381
	iTAP oligo #2	26.9	16.9	29.7571	24.519	6.75117	3.89779
	TACE oligo #1	69.7571	-73.1	42.6143	13.0905	75.8669	43.8018
	TACE oligo#2	4.04286	-18.8143	28.3286	4.51905	23.575	13.6111
200ng/mL LPS	no oligo	1411.19	1669.76	1504.04	1528.33	130.985	75.6244
	ns oligo	1578.33	1469.76	1514.04	1520.71	54.5919	31.5186
	iTAP oligo #1	291.186	315.471	299.757	302.138	12.3167	7.11104
	iTAP oligo #2	334.043	434.043	312.614	360.233	64.8127	37.4196
	TACE oligo #1	179.757	111.186	165.471	152.138	36.1779	20.8873
	TACE oligo#2	141.186	158.329	206.9	168.805	34.0867	19.68
100ng/mL LPS	no oligo	1422.61	1761.19	1352.61	1512.14	218.503	126.153
	ns oligo	1142.61	1362.61	1322.61	1275.95	117.189	67.6593
	iTAP oligo #1	169.757	172.614	132.614	158.329	22.315	12.8836
	iTAP oligo #2	189.757	228.329	238.329	218.805	25.6481	14.8079
	TACE oligo #1	52.6143	51.1857	96.9	66.9	25.9906	15.0057
	TACE oligo#2	68.3286	56.9	149.757	91.6619	50.6354	29.2344
	Standard Curve
	Pro conc (ug/ml)	#1	#2	#3	Average	Blanked
	1000	0.1302	0.1497		0.13995	0.10505
	500	0.1059	0.1098		0.10785	0.07295
	250	0.087	0.0849		0.08595	0.05105
	125	0.0612	0.0636		0.0624	0.0275
	62.5	0.0506	0.0492		0.0499	0.015
	31.25	0.0432	0.0439		0.04355	0.00865
	15.625	0.044	0.0389		0.04145	0.00655
	0	0.0369	0.0329		0.0349	0
	C value from Standard Curve			M value from Standard Curve
	0.009917			0.000105
	Protein Samples	#1	#2	#3	#1	#2	#3
	sample 1	0.0539	0.0464	0.0494	0.019	0.0115	0.0145
	sample 2	0.0443	0.0527	0.0486	0.0094	0.0178	0.0137
	sample 3	0.0456	0.0456	0.0458	0.0107	0.0107	0.0109
	sample 4	0.0467	0.046	0.0469	0.0118	0.0111	0.012
	sample 5	0.0497	0.0397	0.0478	0.0148	0.0048	0.0129
	sample 6	0.0451	0.0435	0.0468	0.0102	0.0086	0.0119
	sample 7	0.1436	0.1617	0.1501	0.1087	0.1268	0.1152
	sample 8	0.1553	0.1477	0.1508	0.1204	0.1128	0.1159
	sample 9	0.0652	0.0669	0.0658	0.0303	0.032	0.0309
	sample 10	0.0682	0.0752	0.0667	0.0333	0.0403	0.0318
	sample 11	0.0574	0.0526	0.0564	0.0225	0.0177	0.0215
	sample 12	0.0547	0.0559	0.0593	0.0198	0.021	0.0244
	sample 13	0.1444	0.1681	0.1395	0.1095	0.1332	0.1046
	sample 14	0.1248	0.1402	0.1374	0.0899	0.1053	0.1025
	sample 15	0.0567	0.0569	0.0541	0.0218	0.022	0.0192
	sample 16	0.0581	0.0608	0.0615	0.0232	0.0259	0.0266
	sample 17	0.0485	0.0484	0.0516	0.0136	0.0135	0.0167
	sample 18	0.0496	0.0488	0.0553	0.0147	0.0139	0.0204

## Sheet: TNF (3)
	Title: iTAP is essential for TNF secretion in primary macrophages. Figure 7E
	TNF Replicate #3 (not shown)
	Protein Conc(pg/ml)	#1	#2	#3	Average	STDEV	STD ERROR
0 LPS	no oligo	424.151	118.491	160	234.214	165.795	95.7215
	ns oligo	160	254.34	382.642	265.66	111.752	64.5198
	iTAP oligo #1	92.0755	-70.1887	99.6226	40.5031	95.9362	55.3888
	iTAP oligo #2	160	24.1509	27.9245	70.6918	77.3662	44.6674
	TACE oligo #1	141.132	27.9245	212.83	127.296	93.2261	53.8241
	TACE oligo#2	156.226	-85.283	269.434	113.459	181.184	104.607
200ng/mL LPS	no oligo	1858.11	2039.25	1986.42	1961.26	93.1497	53.78
	ns oligo	1782.64	1767.55	1982.64	1844.28	120.065	69.3195
	iTAP oligo #1	514.717	586.415	797.736	632.956	147.138	84.9499
	iTAP oligo #2	676.981	360	718.491	585.157	196.093	113.215
	TACE oligo #1	741.132	703.396	488.302	644.277	136.39	78.7445
	TACE oligo#2	375.094	839.245	741.132	651.824	244.624	141.234
100ng/mL LPS	no oligo	1737.36	1858.11	1752.45	1782.64	65.7947	37.9866
	ns oligo	1944.91	1609.06	2054.34	1869.43	232.037	133.967
	iTAP oligo #1	163.774	382.642	258.113	268.176	109.78	63.3817
	iTAP oligo #2	163.774	563.774	593.962	440.503	240.13	138.639
	TACE oligo #1	307.17	73.2075	205.283	195.22	117.305	67.7262
	TACE oligo#2	160	76.9811	186.415	141.132	57.1047	32.9694
	Standard Curve
	Pro conc (ug/ml)	#1	#2	#3	Average	Blanked
	1000	0.0967	0.0991		0.0979	0.0572
	500	0.0744	0.0735		0.07395	0.03325
	250	0.0636	0.0644		0.064	0.0233
	125	0.0586	0.0606		0.0596	0.0189
	62.5	0.0507	0.0523		0.0515	0.0108
	31.25	0.0455	0.0504		0.04795	0.00725
	15.625	0.0418	0.0453		0.04355	0.00285
	0	0.0405	0.0409		0.0407	0
	C value from Standard Curve			M value from Standard Curve
	0.00596			5.3e-05
	Protein Samples	#1	#2	#3	#1	#2	#3
	sample 1	0.0579	0.0498	0.0509	0.0172	0.0091	0.0102
	sample 2	0.0509	0.0534	0.0568	0.0102	0.0127	0.0161
	sample 3	0.0491	0.0448	0.0493	0.0084	0.0041	0.0086
	sample 4	0.0509	0.0473	0.0474	0.0102	0.0066	0.0067
	sample 5	0.0504	0.0474	0.0523	0.0097	0.0067	0.0116
	sample 6	0.0508	0.0444	0.0538	0.0101	0.0037	0.0131
	sample 7	0.0959	0.1007	0.0993	0.0552	0.06	0.0586
	sample 8	0.0939	0.0935	0.0992	0.0532	0.0528	0.0585
	sample 9	0.0603	0.0622	0.0678	0.0196	0.0215	0.0271
	sample 10	0.0646	0.0562	0.0657	0.0239	0.0155	0.025
	sample 11	0.0663	0.0653	0.0596	0.0256	0.0246	0.0189
	sample 12	0.0566	0.0689	0.0663	0.0159	0.0282	0.0256
	sample 13	0.0927	0.0959	0.0931	0.052	0.0552	0.0524
	sample 14	0.0982	0.0893	0.1011	0.0575	0.0486	0.0604
	sample 15	0.051	0.0568	0.0535	0.0103	0.0161	0.0128
	sample 16	0.051	0.0616	0.0624	0.0103	0.0209	0.0217
	sample 17	0.0548	0.0486	0.0521	0.0141	0.0079	0.0114
	sample 18	0.0509	0.0487	0.0516	0.0102	0.008	0.0109

## Sheet: TNF (1)
	Title: iTAP is essential for TNF secretion in primary macrophages. Figure 7E
	TNF Replicate #1 ( not shown)
	Protein Conc(pg/ml)	#1	#2	#3	Average	STDEV	STD ERROR
0 LPS	control oligo	633.035	417.741	428.329	493.035	121.359	70.0667
	iTAP oligo	89.5059	75.3882	318.918	161.271	136.709	78.9288
	TACE oligo	177.741	54.2118	47.1529	93.0353	73.4423	42.4019
100ng/mL LPS	control oligo	1617.74	1518.92	1681.27	1605.98	81.8134	47.235
	iTAP oligo	262.447	368.329	385.976	338.918	66.8107	38.5732
	TACE oligo	213.035	223.624	396.565	277.741	103.04	59.4903
50 ng/mL LPS	control oligo	798.918	820.094	802.447	807.153	11.3455	6.55031
	iTAP oligo	276.565	121.271	142.447	180.094	84.2143	48.6211
	TACE oligo	61.2706	75.3882	117.741	84.8	29.3882	16.9673
	Standard Curve
	Pro conc (ug/ml)	#1	#2	#3	Average	Blanked
	1000	0.1251	0.1285		0.1268	0.0897
	500	0.0871	0.0869		0.087	0.0499
	250	0.0643	0.0664		0.06535	0.02825
	125	0.0585	0.0653		0.0619	0.0248
	62.5	0.0475	0.0606		0.05405	0.01695
	31.25	0.042	0.0452		0.0436	0.0065
	15.625	0.0407	0.041		0.04085	0.00375
	0	0.0377	0.0365		0.0371	0
	C value from Standard Curve			M value from Standard Curve
	0.006364			8.5e-05
	Protein Samples	#1	#2	#3	#1	#2	#3
	sample 1	0.0614	0.0553	0.0556	0.0243	0.0182	0.0185
	sample 2	0.046	0.0456	0.0525	0.0089	0.0085	0.0154
	sample 3	0.0485	0.045	0.0448	0.0114	0.0079	0.0077
	sample 4	0.0893	0.0865	0.0911	0.0522	0.0494	0.054
	sample 5	0.0509	0.0539	0.0544	0.0138	0.0168	0.0173
	sample 6	0.0495	0.0498	0.0547	0.0124	0.0127	0.0176
	sample 7	0.0661	0.0667	0.0662	0.029	0.0296	0.0291
	sample 8	0.0513	0.0469	0.0475	0.0142	0.0098	0.0104
	sample 9	0.0452	0.0456	0.0468	0.0081	0.0085	0.0097
