# Supplementary material for: iTAP, a novel iRhom interactor, controls TNF secretion by policing the stability of iRhom/TACE
Source: eLife. 2018 Jun 13;7:e35032. doi: 10.7554/eLife.35032 (PMC6042963; doi:10.7554/eLife.35032)
Supplement: Figure 7—source data 2. — IL-6 ELISA. [file elife-35032-fig7-data2.xlsx]

## Sheet: IL-6 (2)
	Title: iTAP is not essential for IL-6 secretion. Figure 7E
	IL-6 Replicate #2 (shown)
	Protein Conc(pg/ml)	#1	#2	#3	Average	STDEV	STD ERROR
0 LPS	no oligo	79.5918	114.286	108.163	100.68	18.5179	10.6913
	ns oligo	163.265	140.816	-44.898	86.3946	114.255	65.9654
	iTAP oligo #1	134.694	110.204	55.102	100	40.7653	23.5358
	iTAP oligo #2	185.714	155.102	108.163	149.66	39.0609	22.5518
	TACE oligo #1	67.3469	134.694	87.7551	96.5986	34.5334	19.9379
	TACE oligo#2	163.265	108.163	65.3061	112.245	49.107	28.3519
200ng/mL LPS	no oligo	814.286	720.408	585.714	706.803	114.891	66.3326
	ns oligo	571.429	773.469	730.612	691.837	106.456	61.4621
	iTAP oligo #1	585.714	540.816	779.592	635.374	126.898	73.2644
	iTAP oligo #2	728.571	548.98	918.367	731.973	184.717	106.647
	TACE oligo #1	508.163	726.531	826.531	687.075	162.81	93.9982
	TACE oligo#2	734.694	504.082	844.898	694.558	173.917	100.411
100ng/mL LPS	no oligo	644.898	675.51	461.224	593.878	115.896	66.9126
	ns oligo	638.776	473.469	622.449	578.231	91.093	52.5926
	iTAP oligo #1	642.857	624.49	383.673	550.34	144.629	83.5018
	iTAP oligo #2	479.592	697.959	624.49	600.68	111.114	64.1515
	TACE oligo #1	455.102	671.429	706.122	610.884	136.022	78.5324
	TACE oligo#2	657.143	432.653	765.306	618.367	169.683	97.9663
	Standard Curve
	Pro conc (ug/ml)	#1	#2	#3	Average	Blanked
	1000	0.1851	0.1805		0.1828	0.1475
	500	0.1305	0.1295		0.13	0.0947
	250	0.0956	0.0947		0.09515	0.05985
	125	0.0622	0.0655		0.06385	0.02855
	62.5	0.0687	0.0538		0.06125	0.02595
	31.25	0.0459	0.0427		0.0443	0.009
	15.625	0.0379	0.0395		0.0387	0.0034
	0	0.0363	0.0343		0.0353	0
	C value from Standard Curve			M value from Standard Curve
	0.0096			0.000147
	Protein Samples	#1	#2	#3	#1	#2	#3
	sample 1	0.0488	0.0505	0.0502	0.0135	0.0152	0.0149
	sample 2	0.0529	0.0518	0.0427	0.0176	0.0165	0.0074
	sample 3	0.0515	0.0503	0.0476	0.0162	0.015	0.0123
	sample 4	0.054	0.0525	0.0502	0.0187	0.0172	0.0149
	sample 5	0.0482	0.0515	0.0492	0.0129	0.0162	0.0139
	sample 6	0.0529	0.0502	0.0481	0.0176	0.0149	0.0128
	sample 7	0.0848	0.0802	0.0736	0.0495	0.0449	0.0383
	sample 8	0.0729	0.0828	0.0807	0.0376	0.0475	0.0454
	sample 9	0.0736	0.0714	0.0831	0.0383	0.0361	0.0478
	sample 10	0.0806	0.0718	0.0899	0.0453	0.0365	0.0546
	sample 11	0.0698	0.0805	0.0854	0.0345	0.0452	0.0501
	sample 12	0.0809	0.0696	0.0863	0.0456	0.0343	0.051
	sample 13	0.0765	0.078	0.0675	0.0412	0.0427	0.0322
	sample 14	0.0762	0.0681	0.0754	0.0409	0.0328	0.0401
	sample 15	0.0764	0.0755	0.0637	0.0411	0.0402	0.0284
	sample 16	0.0684	0.0791	0.0755	0.0331	0.0438	0.0402
	sample 17	0.0672	0.0778	0.0795	0.0319	0.0425	0.0442
	sample 18	0.0771	0.0661	0.0824	0.0418	0.0308	0.0471

## Sheet: IL-6 (3)
	Title: iTAP is not essential for IL-6 secretion. Figure 7E
	IL-6 Replicate #3 (not shown)
	Protein Conc(pg/ml)	#1	#2	#3	Average	STDEV	STD ERROR
0 LPS	no oligo	105.71	215.387	67	129.366	76.97	44.4387
	ns oligo	102.484	76.6774	134.742	104.634	29.0919	16.7962
	iTAP oligo #1	-16.871	241.194	241.194	155.172	148.994	86.0215
	iTAP oligo #2	47.6452	147.645	212.161	135.817	82.8934	47.8585
	TACE oligo #1	102.484	147.645	186.355	145.495	41.9768	24.2353
	TACE oligo#2	92.8065	89.5806	199.258	127.215	62.4119	36.0335
200ng/mL LPS	no oligo	1344.79	1144.79	1110.92	1200.17	126.388	72.9699
	ns oligo	1283.5	1110.92	1052.85	1149.09	119.967	69.2631
	iTAP oligo #1	1296.4	1398.02	1183.5	1292.64	107.308	61.9541
	iTAP oligo #2	1414.15	865.758	923.823	1067.91	301.252	173.928
	TACE oligo #1	1077.05	1175.44	1423.82	1225.44	178.712	103.18
	TACE oligo#2	854.468	1244.79	1233.5	1110.92	222.165	128.267
100ng/mL LPS	no oligo	1168.98	1178.66	1125.44	1157.69	28.3523	16.3692
	ns oligo	1217.37	1418.98	1152.85	1263.07	138.825	80.1508
	iTAP oligo #1	1157.69	1183.5	973.823	1105.01	114.338	66.0131
	iTAP oligo #2	1077.05	1244.79	835.113	1052.32	205.955	118.908
	TACE oligo #1	1251.24	951.242	967.371	1056.62	168.742	97.4232
	TACE oligo#2	1423.82	799.629	1127.05	1116.83	312.222	180.262
	Standard Curve
	Pro conc (ug/ml)	#1	#2	#3	Average	Blanked
	1000	0.1052	0.1003		0.10275	0.0645
	500	0.0734	0.0726		0.073	0.03475
	250	0.059	0.0574		0.0582	0.01995
	125	0.0504	0.0506		0.0505	0.01225
	62.5	0.0448	0.0438		0.0443	0.00605
	31.25	0.0407	0.0448		0.04275	0.0045
	15.625	0.0436	0.0428		0.0432	0.00495
	0	0.0395	0.037		0.03825	0
	C value from Standard Curve			M value from Standard Curve
	0.002873			6.2e-05
	Protein Samples	#1	#2	#3	#1	#2	#3
	sample 1	0.0444	0.0478	0.0432	0.00615	0.00955	0.00495
	sample 2	0.0443	0.0435	0.0453	0.00605	0.00525	0.00705
	sample 3	0.0406	0.0486	0.0486	0.00235	0.01035	0.01035
	sample 4	0.0426	0.0457	0.0477	0.00435	0.00745	0.00945
	sample 5	0.0443	0.0457	0.0469	0.00605	0.00745	0.00865
	sample 6	0.044	0.0439	0.0473	0.00575	0.00565	0.00905
	sample 7	0.1245	0.1121	0.11	0.08625	0.07385	0.07175
	sample 8	0.1207	0.11	0.1064	0.08245	0.07175	0.06815
	sample 9	0.1215	0.1278	0.1145	0.08325	0.08955	0.07625
	sample 10	0.1288	0.0948	0.0984	0.09055	0.05655	0.06015
	sample 11	0.1079	0.114	0.1294	0.06965	0.07575	0.09115
	sample 12	0.0941	0.1183	0.1176	0.05585	0.08005	0.07935
	sample 13	0.1136	0.1142	0.1109	0.07535	0.07595	0.07265
	sample 14	0.1166	0.1291	0.1126	0.07835	0.09085	0.07435
	sample 15	0.1129	0.1145	0.1015	0.07465	0.07625	0.06325
	sample 16	0.1079	0.1183	0.0929	0.06965	0.08005	0.05465
	sample 17	0.1187	0.1001	0.1011	0.08045	0.06185	0.06285
	sample 18	0.1294	0.0907	0.111	0.09115	0.05245	0.07275

## Sheet: IL-6 (1)
	Title: iTAP is not essential for IL-6 secretion. Figure 7E
	IL-6 Replicate #1 ( not shown)
	Protein Conc(pg/ml)	#1	#2	#3	Average	STDEV	STD ERROR
0 LPS	control oligo	107.422	194.169	78.506	126.699	60.1928	34.7523
	iTAP oligo	31.5181	158.024	121.88	103.807	65.1606	37.6205
	TACE oligo	71.2771	158.024	17.0602	82.1205	71.1048	41.0523
100ng/mL LPS	control oligo	927.904	765.253	805.012	832.723	84.7922	48.9548
	iTAP oligo	797.783	772.482	645.976	738.747	81.332	46.957
	TACE oligo	841.157	801.398	765.253	802.602	37.9661	21.9198
50 ng/mL LPS	control oligo	1007.42	855.614	768.867	877.301	120.747	69.7131
	iTAP oligo	898.988	783.325	595.373	759.229	153.235	88.4702
	TACE oligo	703.807	848.386	797.783	783.325	73.3655	42.3576
	Standard Curve
	Pro conc (ug/ml)	#1	#2	#3	Average	Blanked
	1000	0.1269	0.1242		0.12555	0.08765
	500	0.085	0.085		0.085	0.0471
	250	0.0656	0.0697		0.06765	0.02975
	125	0.0518	0.0522		0.052	0.0141
	62.5	0.0481	0.0488		0.04845	0.01055
	31.25	0.0488	0.0527		0.05075	0.01285
	15.625	0.047	0.0435		0.04525	0.00735
	0	0.0364	0.0394		0.0379	0
	C value from Standard Curve			M value from Standard Curve
	0.005628			8.3e-05
	Protein Samples	#1	#2	#3	#1	#2	#3
	sample 1	0.0465	0.0489	0.0457	0.0086	0.011	0.0078
	sample 2	0.0444	0.0479	0.0469	0.0065	0.01	0.009
	sample 3	0.0455	0.0479	0.044	0.0076	0.01	0.0061
	sample 4	0.0692	0.0647	0.0658	0.0313	0.0268	0.0279
	sample 5	0.0656	0.0649	0.0614	0.0277	0.027	0.0235
	sample 6	0.0668	0.0657	0.0647	0.0289	0.0278	0.0268
	sample 7	0.0714	0.0672	0.0648	0.0335	0.0293	0.0269
	sample 8	0.0684	0.0652	0.06	0.0305	0.0273	0.0221
	sample 9	0.063	0.067	0.0656	0.0251	0.0291	0.0277
