# Supplementary material for: iTAP, a novel iRhom interactor, controls TNF secretion by policing the stability of iRhom/TACE
Source: eLife. 2018 Jun 13;7:e35032. doi: 10.7554/eLife.35032 (PMC6042963; doi:10.7554/eLife.35032)
Supplement: Figure 7—source data 3. — IL-8 ELISA. [file elife-35032-fig7-data3.xls]

## Sheet: IL-8 (2)
	Title: iTAP is not essential for IL-8 secretion. Figure 7E
	IL-8 Replicate #2 (shown)
	Protein Conc(pg/ml)	#1	#2	#3	Average	STDEV	STD ERROR
0 LPS	no oligo	153.978	238.422	378.422	256.941	113.362	65.4498
	ns oligo	96.2	229.533	260.644	195.459	87.3572	50.4357
	iTAP oligo #1	251.756	169.533	389.533	270.274	111.163	64.18
	iTAP oligo #2	253.978	96.2	242.867	197.681	88.061	50.842
	TACE oligo #1	320.644	360.644	251.756	311.015	55.0794	31.8001
	TACE oligo#2	256.2	313.978	345.089	305.089	45.1062	26.0421
200ng/mL LPS	no oligo	913.978	1109.53	1278.42	1100.64	182.385	105.3
	ns oligo	1251.76	1271.76	1260.64	1261.39	10.0206	5.78537
	iTAP oligo #1	1180.64	1122.87	1087.31	1130.27	47.1055	27.1964
	iTAP oligo #2	1178.42	1116.2	1136.2	1143.61	31.7656	18.3399
	TACE oligo #1	1133.98	1196.2	1071.76	1133.98	62.2222	35.924
	TACE oligo#2	1218.42	1127.31	1205.09	1183.61	49.2077	28.4101
100ng/mL LPS	no oligo	1018.42	996.2	876.2	963.607	76.5082	44.172
	ns oligo	945.089	838.422	987.311	923.607	76.7337	44.3022
	iTAP oligo #1	1047.31	1000.64	893.978	980.644	78.5988	45.3791
	iTAP oligo #2	993.978	829.533	871.756	898.422	85.4039	49.308
	TACE oligo #1	907.311	1002.87	1027.31	979.163	63.4145	36.6124
	TACE oligo#2	880.644	869.533	1009.53	919.904	77.8201	44.9295
	Standard Curve
	Pro conc (ug/ml)	#1	#2	#3	Average	Blanked
	1000	0.1336	0.1235		0.12855	0.09305
	500	0.087	0.0847		0.08585	0.05035
	250	0.0785	0.0678		0.07315	0.03765
	125	0.0577	0.0542		0.05595	0.02045
	62.5	0.0494	0.0454		0.0474	0.0119
	31.25	0.0409	0.0405		0.0407	0.0052
	15.625	0.0448	0.0388		0.0418	0.0063
	0	0.0361	0.0349		0.0355	0
	C value from Standard Curve			M value from Standard Curve
	0.005871			9e-05
	Protein Samples	#1	#2	#3	#1	#2	#3
	sample 1	0.0483	0.0521	0.0584	0.0128	0.0166	0.0229
	sample 2	0.0457	0.0517	0.0531	0.0102	0.0162	0.0176
	sample 3	0.0527	0.049	0.0589	0.0172	0.0135	0.0234
	sample 4	0.0528	0.0457	0.0523	0.0173	0.0102	0.0168
	sample 5	0.0558	0.0576	0.0527	0.0203	0.0221	0.0172
	sample 6	0.0529	0.0555	0.0569	0.0174	0.02	0.0214
	sample 7	0.0825	0.0913	0.0989	0.047	0.0558	0.0634
	sample 8	0.0977	0.0986	0.0981	0.0622	0.0631	0.0626
	sample 9	0.0945	0.0919	0.0903	0.059	0.0564	0.0548
	sample 10	0.0944	0.0916	0.0925	0.0589	0.0561	0.057
	sample 11	0.0924	0.0952	0.0896	0.0569	0.0597	0.0541
	sample 12	0.0962	0.0921	0.0956	0.0607	0.0566	0.0601
	sample 13	0.0872	0.0862	0.0808	0.0517	0.0507	0.0453
	sample 14	0.0839	0.0791	0.0858	0.0484	0.0436	0.0503
	sample 15	0.0885	0.0864	0.0816	0.053	0.0509	0.0461
	sample 16	0.0861	0.0787	0.0806	0.0506	0.0432	0.0451
	sample 17	0.0822	0.0865	0.0876	0.0467	0.051	0.0521
	sample 18	0.081	0.0805	0.0868	0.0455	0.045	0.0513

## Sheet: IL-8 (1)
	Title: iTAP is not essential for IL-8 secretion. Figure 7E
	IL-8 Replicate #1 ( not shown)
	Protein Conc(pg/ml)	#1	#2	#3	Average	STDEV	STD ERROR
0 LPS	control oligo	375.289	144.178	161.956	227.141	128.608	74.2516
	iTAP oligo	366.4	130.844	304.178	267.141	122.067	70.4756
	TACE oligo	241.956	486.4	308.622	345.659	126.361	72.9545
100 ng/mL LPS	control oligo	2659.73	2393.07	2424.18	2492.33	145.811	84.1841
	iTAP oligo	2717.51	1921.96	1988.62	2209.36	441.33	254.802
	TACE oligo	2393.07	2846.4	2873.07	2704.18	269.76	155.746
50 ng/mL LPS	control oligo	2117.51	1757.51	1988.62	1954.55	182.403	105.31
	iTAP oligo	1997.51	1739.73	1748.62	1828.62	146.33	84.4834
	TACE oligo	2348.62	1673.07	2064.18	2028.62	339.178	195.825
	Standard Curve
	Pro conc (ug/ml)	#1	#2	#3	Average	Blanked
	1000	0.1282	0.131		0.1296	0.09545
	500	0.109	0.1045		0.10675	0.0726
	250	0.0976	0.0901		0.09385	0.0597
	125	0.0736	0.0702		0.0719	0.03775
	62.5	0.0606	0.0616		0.0611	0.02695
	31.25	0.0475	0.0491		0.0483	0.01415
	15.625	0.0405	0.0405		0.0405	0.00635
	0	0.0351	0.0332		0.03415	0
	C value from Standard Curve			M value from Standard Curve
	0.016706			9e-05
	Protein Samples	#1	#2	#3	#1	#2	#3
	sample 1	0.0593	0.0541	0.0545	0.02515	0.01995	0.02035
	sample 2	0.0591	0.0538	0.0577	0.02495	0.01965	0.02355
	sample 3	0.0563	0.0618	0.0578	0.02215	0.02765	0.02365
	sample 4	0.1107	0.1047	0.1054	0.07655	0.07055	0.07125
	sample 5	0.112	0.0941	0.0956	0.07785	0.05995	0.06145
	sample 6	0.1047	0.1149	0.1155	0.07055	0.08075	0.08135
	sample 7	0.0985	0.0904	0.0956	0.06435	0.05625	0.06145
	sample 8	0.0958	0.09	0.0902	0.06165	0.05585	0.05605
	sample 9	0.1037	0.0885	0.0973	0.06955	0.05435	0.06315

## Sheet: IL-8 (3)
	Title: iTAP is not essential for IL-8 secretion. Figure 7E
	IL-8 Replicate #3 ( not shown)
	Protein Conc(pg/ml)	#1	#2	#3	Average	STDEV	STD ERROR
0 LPS	no oligo	345.87	217.609	185	249.493	85.0423	49.0992
	control oligo	274.13	158.913	163.261	198.768	65.3019	37.7021
	iTAP oligo #1	339.348	250.217	200.217	263.261	70.4764	40.6896
	iTAP oligo #2	200.217	248.043	245.87	231.377	27.0067	15.5923
	TACE oligo #1	261.087	287.174	193.696	247.319	48.2361	27.8491
	TACE oligo #2	169.783	267.609	219.783	219.058	48.9171	28.2423
200ng/mL LPS	no oligo	1552.5	1669.89	1930.76	1717.72	193.613	111.782
	control oligo	1699.24	1640.54	1630.76	1656.85	37.0364	21.383
	iTAP oligo #3	1894.89	1412.28	1536.2	1614.46	250.642	144.708
	iTAP oligo #4	1695.98	1751.41	1480.76	1642.72	142.971	82.5443
	TACE oligo #3	1627.5	1555.76	1347.07	1510.11	145.685	84.1111
	TACE oligo #4	1728.59	1614.46	1513.37	1618.8	107.675	62.1659
100ng/mL LPS	no oligo	1986.2	1673.15	1484.02	1714.46	253.622	146.429
	control oligo	1634.02	1607.93	1425.33	1555.76	113.71	65.6507
	iTAP oligo #5	1634.02	1637.28	1428.59	1566.63	119.56	69.0282
	iTAP oligo #6	1360.11	1617.72	1855.76	1611.2	247.89	143.12
	TACE oligo #5	1448.15	1594.89	1457.93	1500.33	82.0418	47.3669
	TACE oligo #6	1275.33	1412.28	1679.67	1455.76	205.65	118.732
	Standard Curve
	Pro conc (ug/ml)	#1	#2	#3	Average	Blanked
	1000	0.13	0.1368		0.1334	0.08645
	500	0.111	0.1051		0.10805	0.0611
	250	0.048	0.0805		0.06425	0.0173
	125	0.0487	0.0643		0.0565	0.00955
	62.5	0.0535	0.0551		0.0543	0.00735
	31.25	0.046	0.0513		0.04865	0.0017
	15.625	0.0468	0.0489		0.04785	0.0009
	0	0.0453	0.0486		0.04695	0
	C value from Standard Curve			M value from Standard Curve
	0.00024			9.2e-05
	Protein Samples	#1	#2	#3	#1	#2	#3
	sample 1	0.0631	0.0572	0.0557	0.01615	0.01025	0.00875
	sample 2	0.0598	0.0545	0.0547	0.01285	0.00755	0.00775
	sample 3	0.0628	0.0587	0.0564	0.01585	0.01175	0.00945
	sample 4	0.0564	0.0586	0.0585	0.00945	0.01165	0.01155
	sample 5	0.0592	0.0604	0.0561	0.01225	0.01345	0.00915
	sample 6	0.055	0.0595	0.0573	0.00805	0.01255	0.01035
	sample 7	0.0948	0.0984	0.1064	0.04785	0.05145	0.05945
	sample 8	0.0993	0.0975	0.0972	0.05235	0.05055	0.05025
	sample 9	0.1053	0.0905	0.0943	0.05835	0.04355	0.04735
	sample 10	0.0992	0.1009	0.0926	0.05225	0.05395	0.04565
	sample 11	0.0971	0.0949	0.0885	0.05015	0.04795	0.04155
	sample 12	0.1002	0.0967	0.0936	0.05325	0.04975	0.04665
	sample 13	0.1081	0.0985	0.0927	0.06115	0.05155	0.04575
	sample 14	0.0973	0.0965	0.0909	0.05035	0.04955	0.04395
	sample 15	0.0973	0.0974	0.091	0.05035	0.05045	0.04405
	sample 16	0.0889	0.0968	0.1041	0.04195	0.04985	0.05715
	sample 17	0.0916	0.0961	0.0919	0.04465	0.04915	0.04495
	sample 18	0.0863	0.0905	0.0987	0.03935	0.04355	0.05175
