# Supplementary figures and images for: iTAP, a novel iRhom interactor, controls TNF secretion by policing the stability of iRhom/TACE
Source: eLife journal article supplement (doi:10.7554/elife.35032), 2018-06-13

Figure 1—figure supplement 1, Oikonomidi *et al.*

A

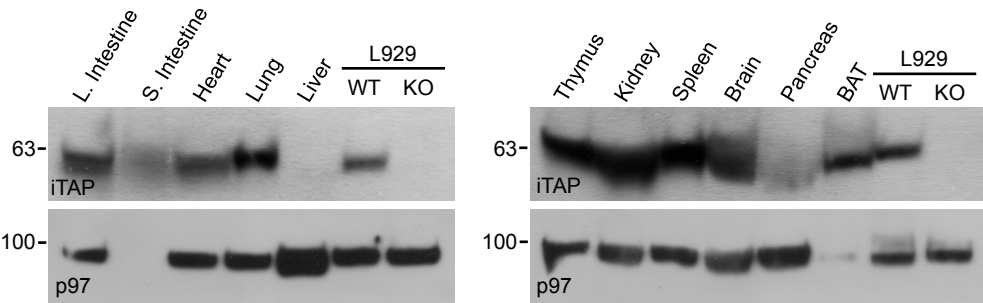

B

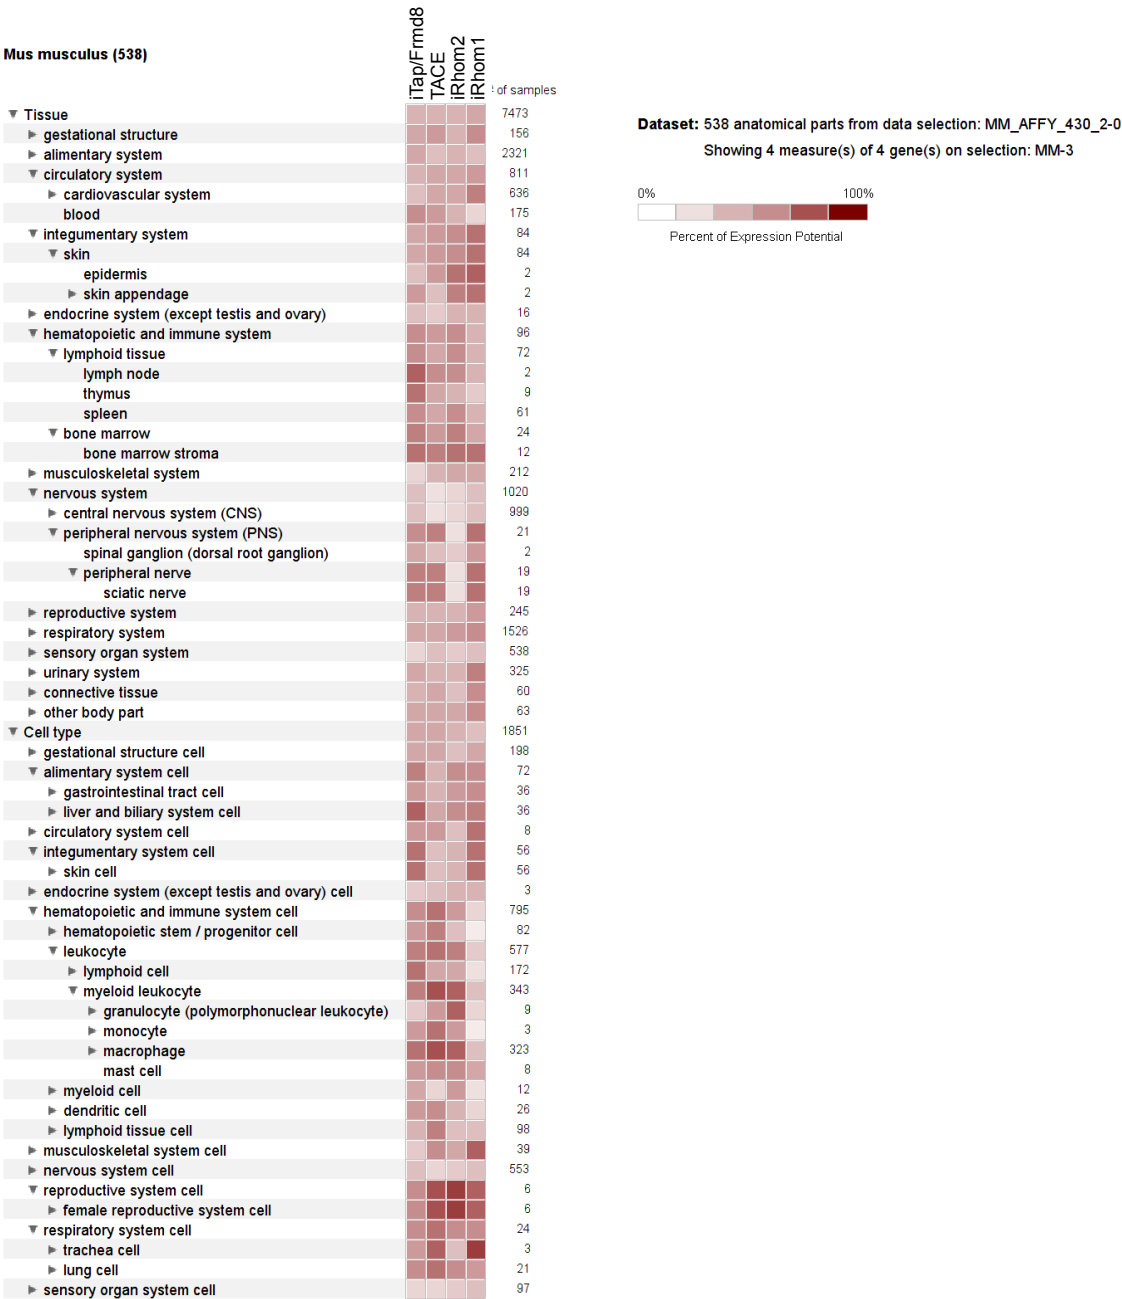

Supplement: supp [file elife_poa_e35032_Figure_1_figure_supplement_1.pdf › elife_poa_e35032_Figure_1_figure_supplement_1.pdf]

Figure 2—figure supplement 1, Oikonomidi *et al.*

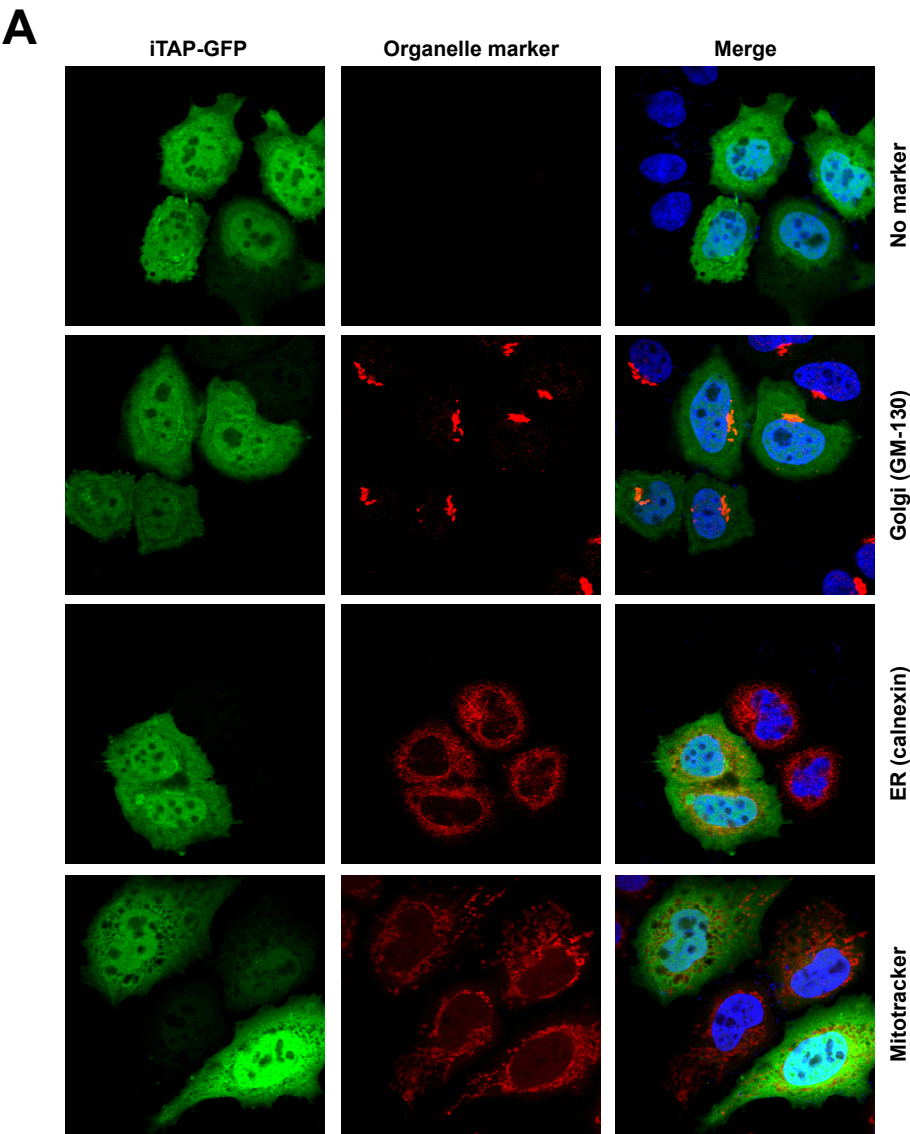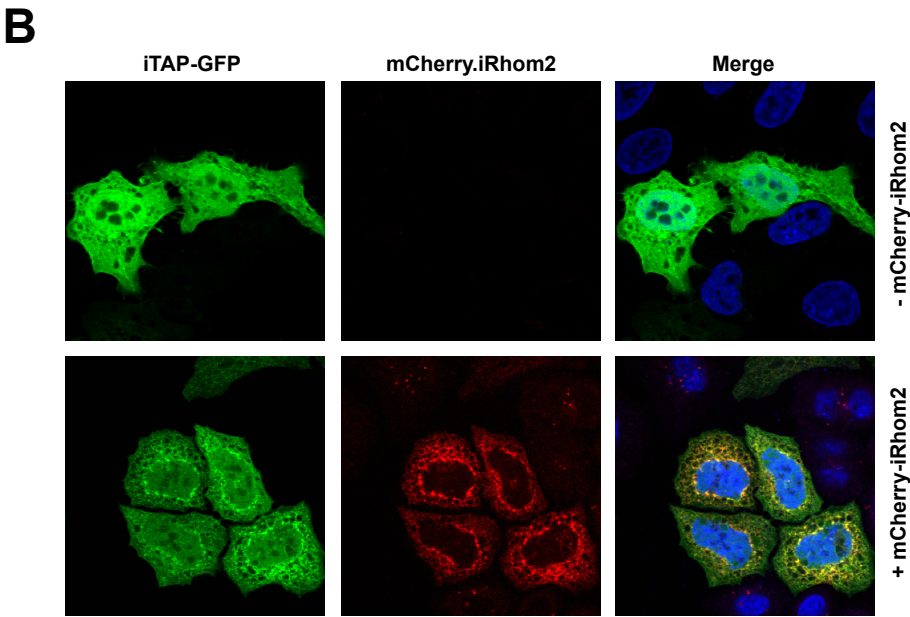

Supplement: supp [file elife_poa_e35032_Figure_2_figure_supplement_1.pdf › elife_poa_e35032_Figure_2_figure_supplement_1.pdf]

**Figure 3—figure supplement 1, Oikonomidi *et al.***

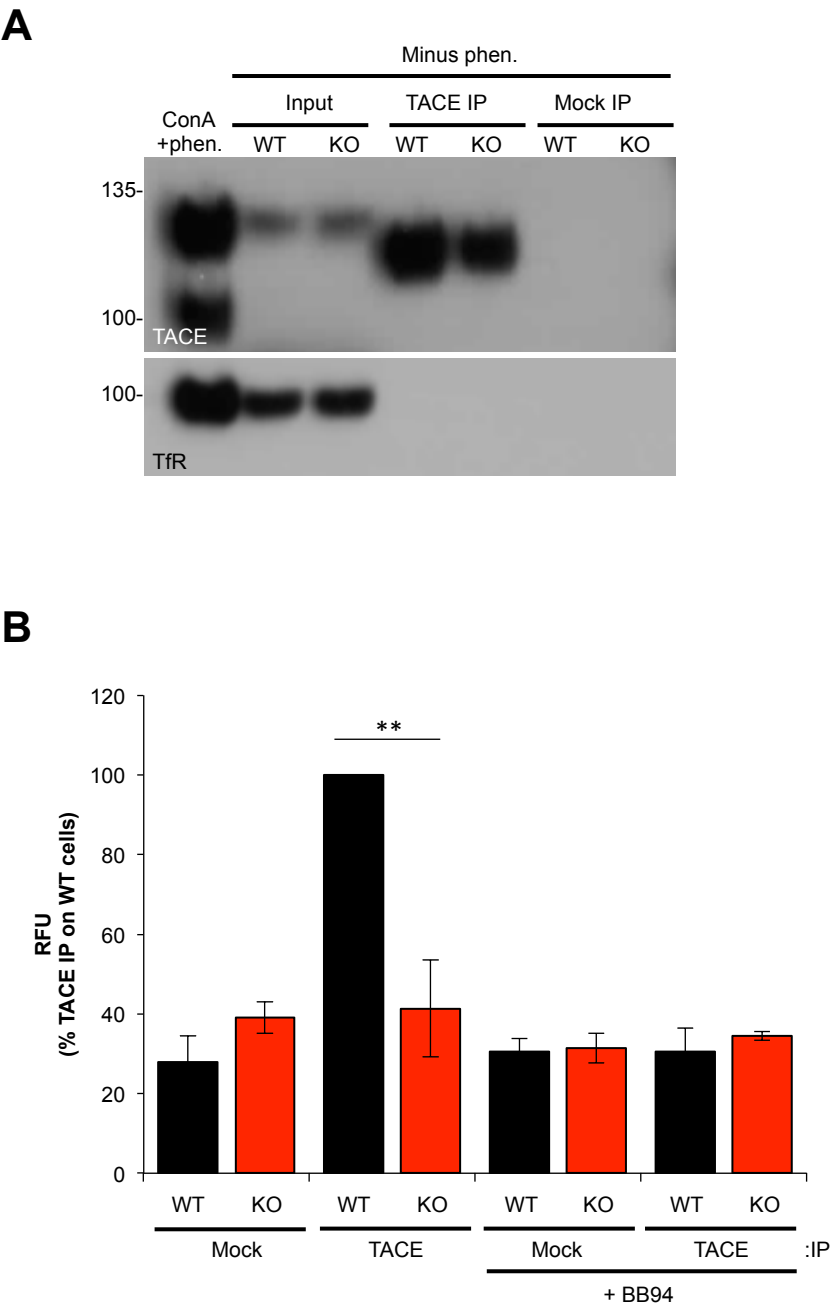

Supplement: supp [file elife_poa_e35032_Figure_3_figure_supplement_1.pdf › elife_poa_e35032_Figure_3_figure_supplement_1.pdf]

**Figure 5—figure supplement 1, Oikonomidi *et al.***

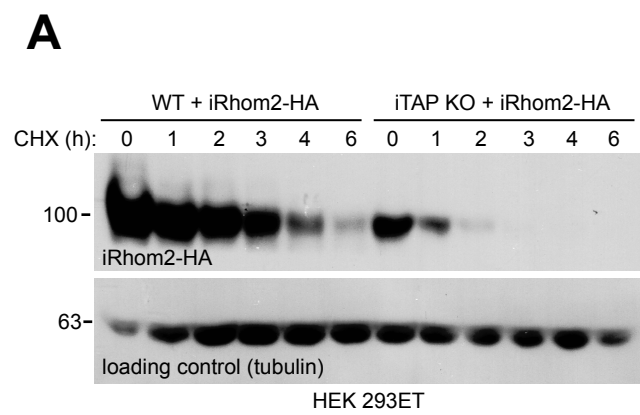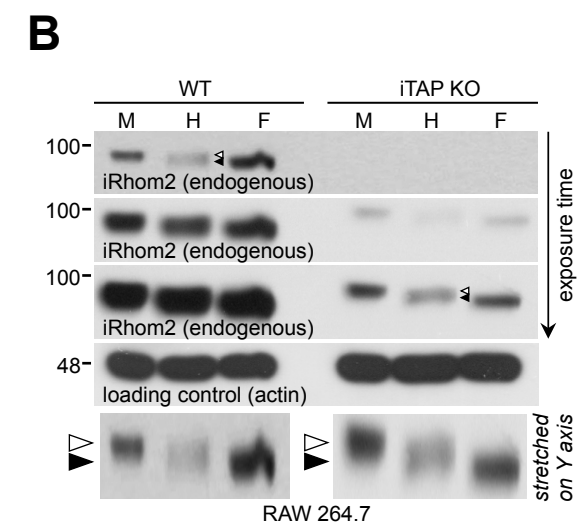

Supplement: supp [file elife_poa_e35032_Figure_5_figure_supplement1.pdf › elife_poa_e35032_Figure_5_figure_supplement1.pdf]

**Figure 6—figure supplement 1**, Oikonomidi *et al.*

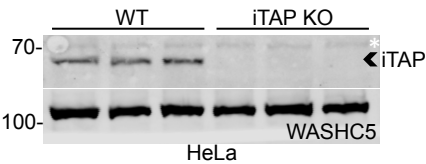

Supplement: supp [file elife_poa_e35032_Figure_6_figure_supplement_1.pdf › elife_poa_e35032_Figure_6_figure_supplement_1.pdf]

Figure 7—figure supplement 1, Oikonomidi *et al.*

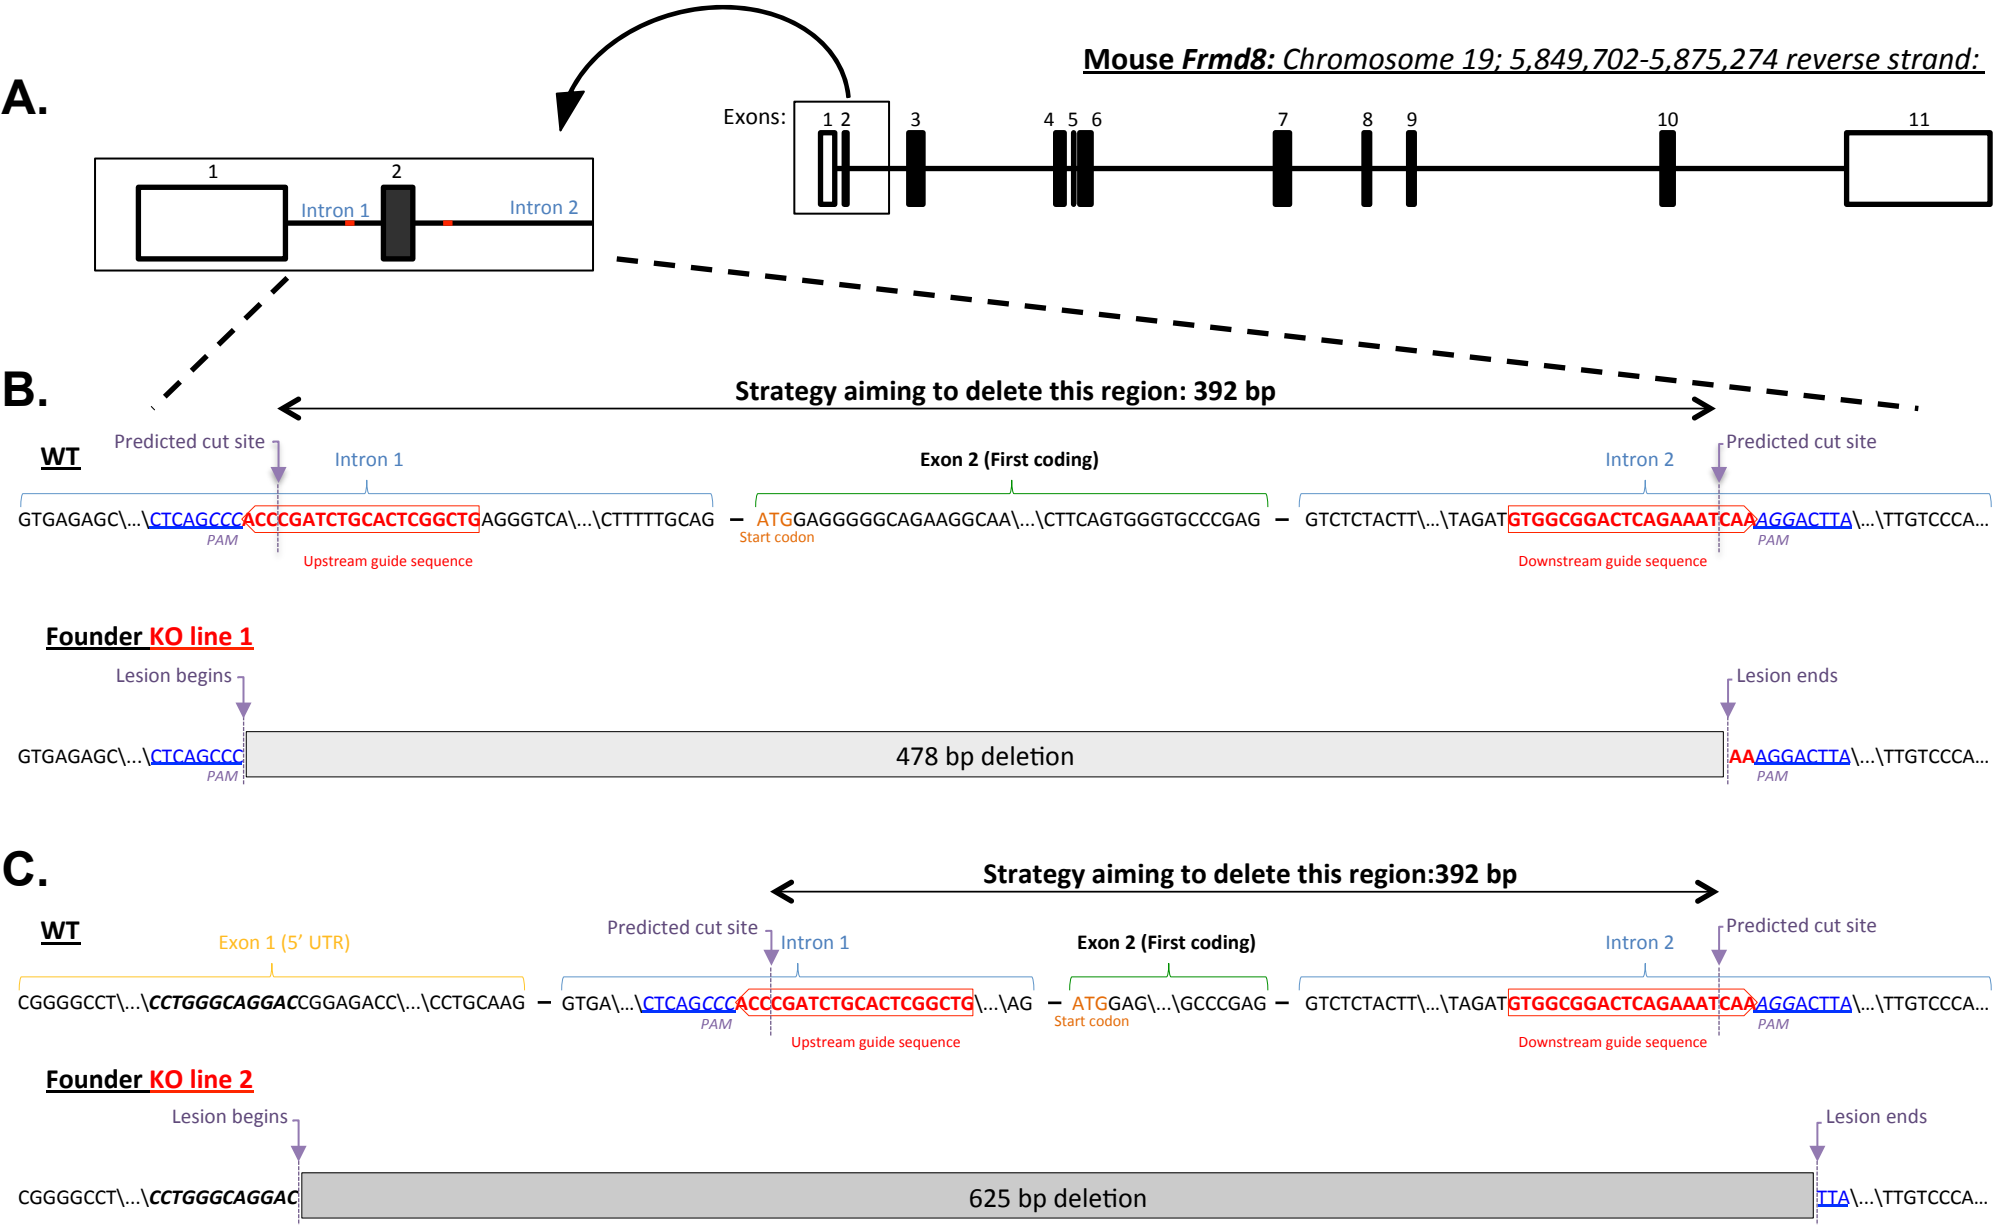

Supplement: supp [file elife_poa_e35032_Figure_7_figure_supplement_1.pdf › elife_poa_e35032_Figure_7_figure_supplement_1.pdf]

Figure 8—figure supplement 1, Oikonomidi *et al.*

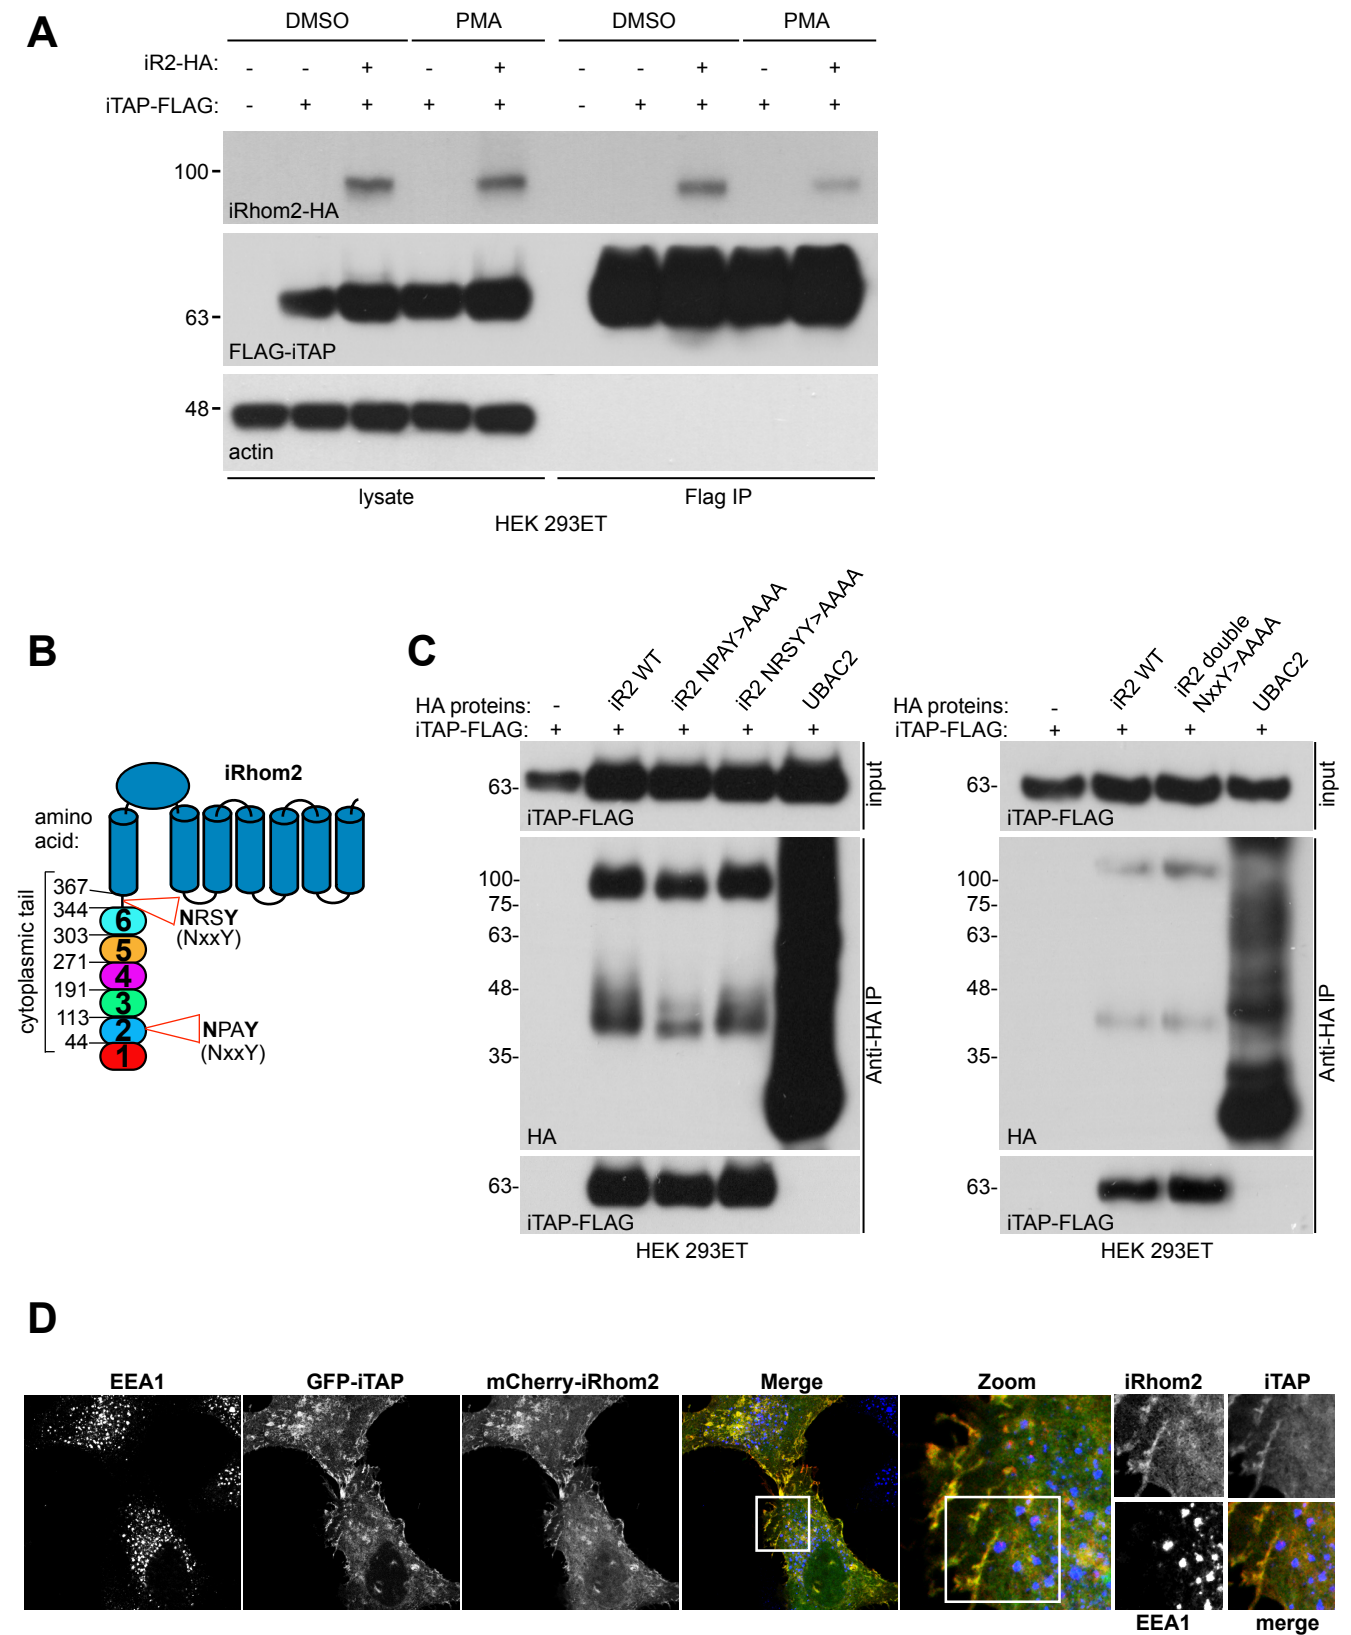

Supplement: supp [file elife_poa_e35032_Figure_8_figure_supplement_1.pdf › elife_poa_e35032_Figure_8_figure_supplement_1.pdf]
